# Supplementary material for: Complete Genome Sequences of Seven Vibrio anguillarum Strains as Derived from PacBio Sequencing
Source: Oxford University Press journal article supplement (doi:10.1093/gbe/evy074), 2018-04-01
Supplement: evy074_supp.zip [file evy074_supp.zip]

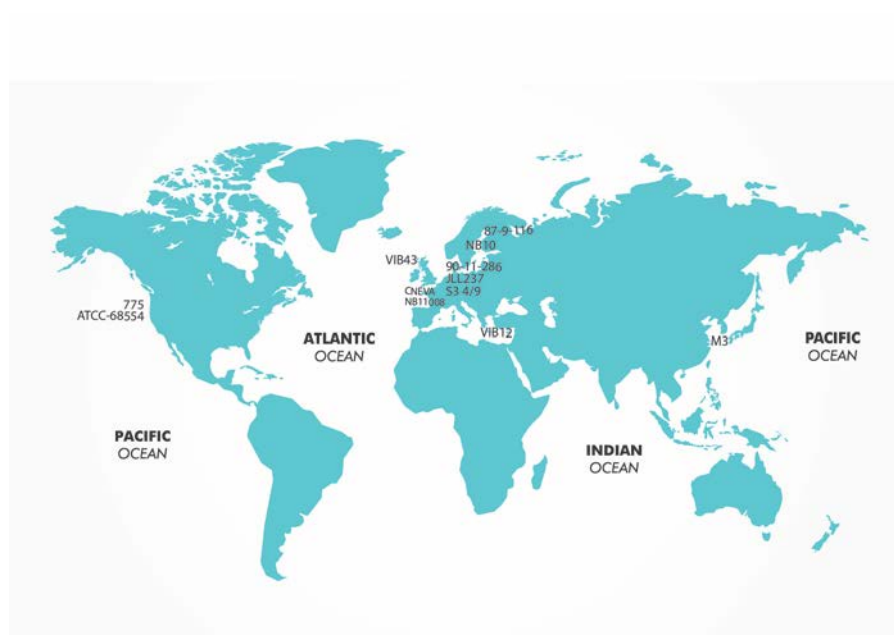

**Fig. S1.**—World map showing the approximate global locations from which the eleven completely sequenced strains have been isolated. The information on each strain was extracted from the BioSample database.

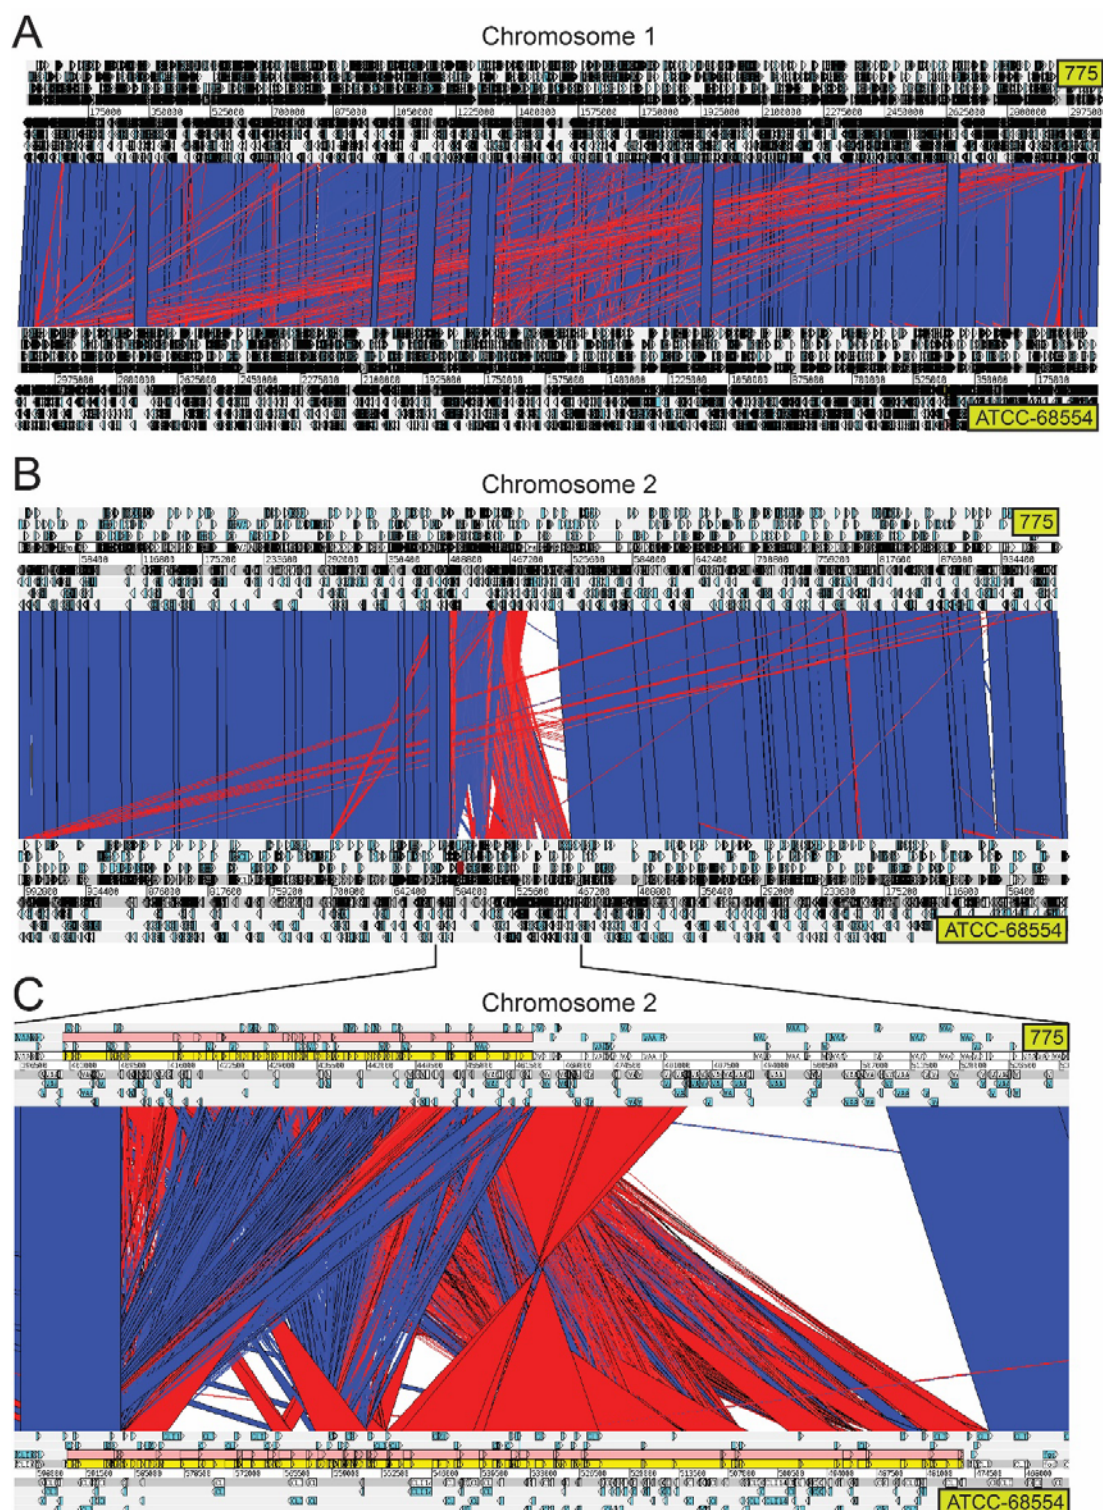

**Fig. S2.**—Comparison of genome sequences generated from strains ATCC-68554 (this study) and 775. Chromosome 1 (A) and Chromosome 2 (B) from the two strains ATCC-68554 and 775 are shown. In the ATCC Bacteriology Collection, the two strain names are listed as synonymous. Strain ATCC-68554 was acquired from ATCC and sequenced in this study to verify this relationship. Overall the comparison shows that the two sequences are highly similar, except for a ~120kbp region (C) on Chromosome 2. This region represents a well-described superintegron (see Cambray et al 2010). The *attC*-containing regions (i.e., the superintegron) are marked in yellow.



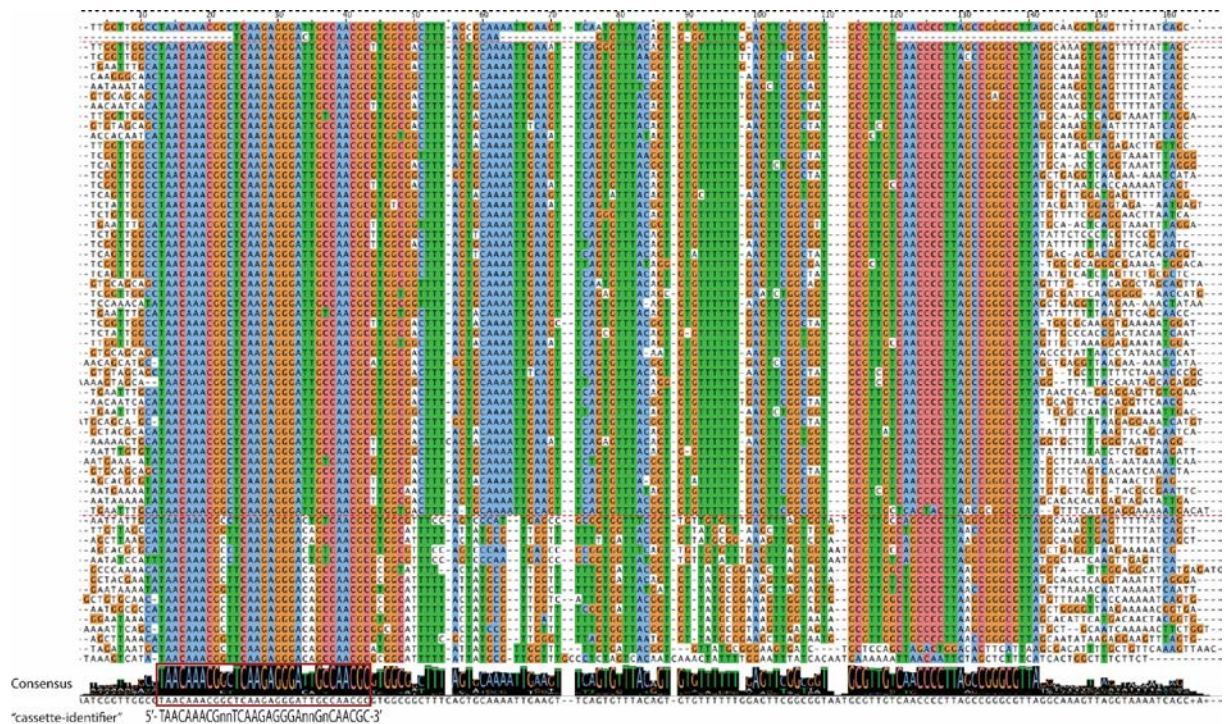

**Fig. S3:** Alignment of *attC*-sites from strain NB10 showing the consensus sequence of the conserved 31-nt region used as gene cassette (VAR) identifier within the superintegrants.

VchIntIA-gi | 3095165 | gb|AAC38424.1 |  
pacbVIB12 (02) c2\_VangIntIA  
WP\_017043784 (VangIntIA)  
pacbVIB43 (01) c2\_VangIntIA  
S349 (01) c2\_VangIntIA  
JLL237 (01) c2\_VangIntIA  
CNEVA\_NB11008 (03) c2\_VangIntIA  
9011286 (01) c2\_VchIntIA-like  
VanB10 (01) c2\_VangIntIA\_Ntrunc (ISVa5)  
ATCC68554 (01) c2\_VangIntIA\_Ntrunc (ISVa5)  
879116 (01) c2\_VangIntIA\_Ntrunc (ISVa5)  
9011287 (01) c2\_VangIntIA\_Ntrunc (ISVa5)

VchIntIA-gi | 3095165 | gb|AAC38424.1 |  
pacbVIB12 (02) c2\_VangIntIA  
WP\_017043784 (VangIntIA)  
pacbVIB43 (01) c2\_VangIntIA  
S349 (01) c2\_VangIntIA  
JLL237 (01) c2\_VangIntIA  
CNEVA\_NB11008 (03) c2\_VangIntIA  
9011286 (01) c2\_VchIntIA-like  
VanB10 (01) c2\_VangIntIA\_Ntrunc (ISVa5)  
ATCC68554 (01) c2\_VangIntIA\_Ntrunc (ISVa5)  
879116 (01) c2\_VangIntIA\_Ntrunc (ISVa5)  
9011287 (01) c2\_VangIntIA\_Ntrunc (ISVa5)

VchIntIA-gi | 3095165 | gb|AAC38424.1 |  
pacbVIB12 (02) c2\_VangIntIA  
WP\_017043784 (VangIntIA)  
pacbVIB43 (01) c2\_VangIntIA  
S349 (01) c2\_VangIntIA  
JLL237 (01) c2\_VangIntIA  
CNEVA\_NB11008 (03) c2\_VangIntIA  
9011286 (01) c2\_VchIntIA-like  
VanB10 (01) c2\_VangIntIA\_Ntrunc (ISVa5)  
ATCC68554 (01) c2\_VangIntIA\_Ntrunc (ISVa5)  
879116 (01) c2\_VangIntIA\_Ntrunc (ISVa5)  
9011287 (01) c2\_VangIntIA\_Ntrunc (ISVa5)

VchIntIA-gi | 3095165 | gb|AAC38424.1 |  
pacbVIB12 (02) c2\_VangIntIA  
WP\_017043784 (VangIntIA)  
pacbVIB43 (01) c2\_VangIntIA  
S349 (01) c2\_VangIntIA  
JLL237 (01) c2\_VangIntIA  
CNEVA\_NB11008 (03) c2\_VangIntIA  
9011286 (01) c2\_VchIntIA-like  
VanB10 (01) c2\_VangIntIA\_Ntrunc (ISVa5)  
ATCC68554 (01) c2\_VangIntIA\_Ntrunc (ISVa5)  
879116 (01) c2\_VangIntIA\_Ntrunc (ISVa5)  
9011287 (01) c2\_VangIntIA\_Ntrunc (ISVa5)
