# Supplementary material for: Complete Genome Sequences of Seven Vibrio anguillarum Strains as Derived from PacBio Sequencing
Source: Oxford University Press journal article supplement (doi:10.1093/gbe/evy074), 2018-04-01
Supplement: evy074_supp.zip [file evy074_supp.zip]

**Table S1. Pacific Biosciences sequencing statistics.**

| <b>Strain</b>        | <b>Number of reads</b> | <b>Average read length (bp)</b> | <b>Total number of base reads (Mb)</b> | <b>Avg. insert length (bp)</b> | <b>N50 insert length (bp)</b> | <b>Avg. coverage</b> | <b>Number of circularized contigs<sup>1</sup></b> |
|----------------------|------------------------|---------------------------------|----------------------------------------|--------------------------------|-------------------------------|----------------------|---------------------------------------------------|
| <b>87-9-116</b>      | 70 764                 | 14 341                          | 1014.81                                | 10 565                         | 12 639                        | 180.5                | 2                                                 |
| <b>JLL237</b>        | 139 094                | 4 662                           | 643                                    | 3 635                          | 6 051                         | 118.2                | 3                                                 |
| <b>S3 4/9</b>        | 32 981                 | 12 412                          | 409.4                                  | 9 521                          | 12 268                        | 84.4                 | 2                                                 |
| <b>CNEVA NB11008</b> | 83 091                 | 13 548                          | 1125.73                                | 8 303                          | 9 283                         | 198.4                | 3                                                 |
| <b>VIB43</b>         | 86 652                 | 14 551                          | 1260.84                                | 8 864                          | 9 960                         | 207.8                | 3                                                 |
| <b>ATCC-68554</b>    | 58 664                 | 13 446                          | 788.79                                 | 9 087                          | 10 396                        | 155.17               | 3                                                 |
| <b>VIB12</b>         | 64 225                 | 10 633                          | 683.92                                 | 8 430                          | 11 094                        | 113.7                | 3                                                 |

<sup>1</sup> The number of circularised contigs is based on the result from Mimimus v.2 followed by correction by SMRT Analysis version v2.3.0. For strain CNEVA NB11008 and JLL237, the number of contigs does not correlate with the actual number of circular chromosomes and plasmids in the bacterium, and was corrected bioinformatically (see main text). VIB12 and VIB43 each harbour two chromosomes and two plasmids not reported before, 15 kB and 292 kB, respectively [the latter containing mainly the COG-classes “function unknown” (30,2%) and “replication and repair” (62,6%; also covering transposases), without blast-overlaps with the two chromosomes, except for a few IS-elements in common].

**Table S2:** Presence of pJM1-like plasmids and the occurrences of complete or truncated integrase VangIntIA in *V. anguillarum* genomes.

| <i>Vibrio anguillarum</i> strains<br>(complete ●/ partial genome ●) <sup>1</sup> |   | pJM1<br>(2×ISVa5) | VangIntIA in chr2 <sup>2</sup><br>(truncated/complete) | Chr 2<br>size (Mb) | Superintegron position<br><i>attC</i> -span in chr2 (%:SI/chr2) | Number of<br><i>attC</i> -sites<br>in chr2 <sup>3</sup> |
|----------------------------------------------------------------------------------|---|-------------------|--------------------------------------------------------|--------------------|-----------------------------------------------------------------|---------------------------------------------------------|
| NB10 (O1)                                                                        | ● | +                 | ISVa5-Ntrunc                                           | 1.187342           | 437,197–584,697 (12.7%)                                         | 65                                                      |
| ATCC68554/775 (O1; USA)                                                          | ● | +                 | ISVa5-Ntrunc                                           | 0.997600           | 475,118–594,260 (12.2%)                                         | 67                                                      |
| 775CrosaNC15637 (O1, USA)<br>(replication origo at 12h)                          | ● | +                 | ISVa5-Ntrunc                                           | 0.988135           | 402,279–467,168 (<6.9%)                                         | 64                                                      |
| VIB93 (O1)                                                                       | ● | +                 | ISVa5-Ntrunc                                           | -                  | -                                                               | (30)                                                    |
| 90-11-287 (O1)                                                                   | ● | +                 | ISVa5-Ntrunc                                           | -                  | -                                                               | (23)                                                    |
| VIB18 (O1)                                                                       | ● | +                 | ISVa5-Ntrunc                                           | -                  | -                                                               | (38)                                                    |
| VA1 (O1; Greece)                                                                 | ● | +                 | ISVa5-Ntrunc                                           | -                  | -                                                               | (23)                                                    |
| T265 (O1; United Kingdom)                                                        | ● | +                 | ISVa5-Ntrunc                                           | -                  | -                                                               | (28)                                                    |
| LMG 12010 (O1)                                                                   | ● | +                 | ISVa5-Ntrunc                                           | -                  | -                                                               | (25)                                                    |
| 91-8-178 (O1)                                                                    | ● | +                 | ISVa5-Ntrunc                                           | -                  | -                                                               | (23)                                                    |
| 91-7-154 O1)                                                                     | ● | +                 | ISVa5-Ntrunc                                           | -                  | -                                                               | (27)                                                    |
| 9014-8 (O1)                                                                      | ● | +                 | ISVa5-Ntrunc                                           | -                  | -                                                               | (30)                                                    |
| 87-9-117 (O1)                                                                    | ● | +                 | ISVa5-Ntrunc                                           | -                  | -                                                               | (23)                                                    |
| 6018-1 (O1)                                                                      | ● | +                 | ISVa5-Ntrunc                                           | -                  | -                                                               | (30)                                                    |
| 601-90 (O1)                                                                      | ● | +                 | ISVa5-Ntrunc                                           | -                  | -                                                               | (24)                                                    |
| 261-91 (O1; Italy)                                                               | ● | +                 | ISVa5-Ntrunc                                           | -                  | -                                                               | (24)                                                    |
| 178-90 (O1; Italy)                                                               | ● | +                 | ISVa5-Ntrunc                                           | -                  | -                                                               | (23)                                                    |
| M3 (O1; China/Japan)                                                             | ● | +                 | ISVa5-Ntrunc                                           | 0.988134           | (replic.origo ±12) (<6.9%)                                      | 64                                                      |
| 87-9-116 (O1)                                                                    | ● | -                 | ISVa5-Ntrunc                                           | 1.207200           | 424,099–572,143 (12.5%)                                         | 65                                                      |
| VIB12 (O2; Greece) – p292                                                        | ● | -                 | VangIntIA                                              | 1.282503           | 532,187–748,997 (17.2%)                                         | 78                                                      |
| CNEVA/NB11008 (O3; France)                                                       | ● | -                 | VangIntIA                                              | 1.123902           | 386,342–561,697 (15.9%)                                         | 145                                                     |
| VIB43 (O1; UK) – p15                                                             | ● | -                 | VangIntIA                                              | 1.152744           | 390,188–644,182 (22.3%)                                         | 58                                                      |
| S3 4/9 (O1)                                                                      | ● | -                 | VangIntIA                                              | 1.227548           | 293,375–645,764 (28.9%)                                         | 147                                                     |
| JLL237 (O1)                                                                      | ● | -                 | VangIntIA                                              | 1.164167           | 392,055–529,604 (12.1%)                                         | 93                                                      |
| 90-11-286 (O1)                                                                   | ● | -                 | VangIntIA                                              | 1.293370           | (replic.origo ± 12) (14.1%)                                     | 106                                                     |
| PF4 (O3; Chile)                                                                  | ● | -                 | VangIntIA                                              | -                  | -                                                               | (15)                                                    |

|                     |   |   |           |   |   |      |
|---------------------|---|---|-----------|---|---|------|
| HI 610 (O2a)        | ● | - | VangIntIA | - | - | (7)  |
| PF430-3 (O3; Chile) | ● | - | VangIntIA | - | - | (13) |
| PF7 (O3; Chile)     | ● | - | VangIntIA | - | - | (46) |
| S2-2-9 (O1)         | ● | - | VangIntIA | - | - | (1)  |
| DEM21597 (O2)       | ● | - | VangIntIA | - | - | (3)  |

<sup>1</sup> Serovariant number in parenthesis (and geographical origin, if isolated outside Scandinavia). Strains VIB12 and VIB43 harbor specific plasmids, p292 and p15, respectively. None of these two plasmids contain ISVa5-elements, but both have several copies of ISVa11. The ISVa5-orf3 and ISVa11-orf3 transposases are 88,5% aminoacid-identical (similarity=94,6%; gaps=5/514), cfr.: <https://www-is.biotoul.fr/>. The p292-plasmid contains replication and repair genes, including transposases (>62%), and genes with unknown function (>30%).

<sup>2</sup> A complete VangIntIA consists of 690 bp/330aa; the ISVa5-truncated version: 501 bp/167aa. The N-term part/12aa in Crosa775-chr2-IntIAtruncated *annotated* 2017-version [VAA\_RS18025: (LTSRPVGSWGGY)VRVWQ ..] belong to the C-term part of an ISVa5.

<sup>3</sup> *Parenthetical* numbers represent *attC*-sites within *unfinished* genomes. Sizes of their respective published chromosome2s seem quite normal, i.e. between 975 – 1.110 kB, thus calling attention to putative missing or lost IS-cassette genes. A low number of *attC*-sites does also apply to the pr March 2018 published unfinished strains: A023 (24), 51-82-2 (25), 4299 (6) and Ba35 (26).

**Table S3:** IS-elements from *V. anguillarum* available in the ISfinder database.

| N° | Name    | Family | Group   | Synonyms | Iso    | Origin                    | Length | IR    | DR | ORF                                              | Accession Number |
|----|---------|--------|---------|----------|--------|---------------------------|--------|-------|----|--------------------------------------------------|------------------|
| 1  | IS1358A | ISAs1  |         |          | IS1358 | <i>Vibrio anguillarum</i> | 1326   | 16/17 |    | 377 (174-1307)                                   | U93591           |
| 2  | ISVa1   | IS5    | IS903   | ISV-A1   |        | <i>Vibrio anguillarum</i> | 1041   | 27/39 | 9  | 302 (79-987)                                     | L40497           |
| 3  | ISVa10  | ISL3   |         |          |        | <i>Vibrio anguillarum</i> | 1349   | 19/22 | 7  | 389 (167-1336)                                   |                  |
| 4  | ISVa11  | IS66   |         |          |        | <i>Vibrio anguillarum</i> | 2376   | 13/19 |    | 106 (81-401)<br>117 (398-751)<br>510 (811-2343)  |                  |
| 5  | ISVa12  | IS66   |         |          |        | <i>Vibrio anguillarum</i> | 2378   | 14/19 | 8  | 106 (81-401)<br>117 (398-751)<br>510 (811-2343)  |                  |
| 6  | ISVa13  | ISAs1  |         |          |        | <i>Vibrio anguillarum</i> | 1235   | 17/21 |    | 371 (93-1208)                                    |                  |
| 7  | ISVa14  | IS4    | ISH8    |          |        | <i>Vibrio anguillarum</i> | 1390   | 18/24 | 10 | 422 (109-1377)                                   |                  |
| 8  | ISVa15  | IS630  |         |          |        | <i>Vibrio anguillarum</i> | 1097   | 19/24 | 2  | 347 (47-1090)                                    |                  |
| 9  | ISVa16  | IS4    | IS4     |          |        | <i>Vibrio anguillarum</i> | 1412   | 16/18 | 11 | 435 (92-1399)                                    | CP011460         |
| 10 | ISVa17  | IS1634 |         |          |        | <i>Vibrio anguillarum</i> | 1820   | 21/24 | 6  | 539 (181-1800)                                   |                  |
| 11 | ISVa18  | IS4    | IS50    |          |        | <i>Vibrio anguillarum</i> | 1504   | 16/21 | 8  | 462 (105-1493)                                   | WP_053411098     |
| 12 | ISVa19  | IS256  |         |          |        | <i>Vibrio anguillarum</i> | 1366   | 21/27 | 8  | 412 (99-1337)                                    |                  |
| 13 | ISVa2   | IS5    | IS903   | ISV-A2   |        | <i>Vibrio anguillarum</i> | 1054   | 21/25 | 9  | 306 (80-1000)                                    | L40498           |
| 14 | ISVa20  | IS66   |         |          |        | <i>Vibrio anguillarum</i> | 2397   | 17/22 | 8  | 106 (82-402)<br>117 (399-753)<br>516 (812-2359)  |                  |
| 15 | ISVa3   | IS91   |         |          |        | <i>Vibrio anguillarum</i> | 1508   |       |    | 415 (105-1352)                                   | AY255699         |
| 16 | ISVa4   | IS3    | IS3     |          |        | <i>Vibrio anguillarum</i> | 1254   | 29/36 |    | 99 (69-368)<br>305 (308-1225)<br>385 (69-1225)   |                  |
| 17 | ISVa5   | IS66   |         |          |        | <i>Vibrio anguillarum</i> | 2381   | 15/19 |    | 105 (81-398)<br>117 (395-748)<br>513 (808-2349)  |                  |
| 18 | ISVa6   | IS30   |         |          |        | <i>Vibrio anguillarum</i> | 1091   | 22/27 | 3  | 322 (93-1061)                                    | NZ_LK021130      |
| 19 | ISVa7   | ISL3   |         |          |        | <i>Vibrio anguillarum</i> | 1348   | 22    |    | 412 (97-1335)                                    |                  |
| 20 | ISVa8   | IS66   | ISBst12 |          |        | <i>Vibrio anguillarum</i> | 1563   | 16    | 8  | 88 (102-368)<br>415 (281-1528)<br>475 (102-1528) |                  |
| 21 | ISVa9   | IS66   |         |          |        | <i>Vibrio anguillarum</i> | 2372   | 14/19 | 8  | 106 (81-401)<br>117 (398-751)<br>510 (811-2343)  |                  |

<https://www-is.biotoul.fr>
